# Supplementary material for: Association between Controlling Nutritional Status (CONUT) Score and Body Composition, Inflammation and Frailty in Hospitalized Elderly Patients
Source: MDPI journal article supplement (doi:10.3390/nu16050576), 2024-02-20
Supplement: s1 [file s1]

## Supplementary Materials

**Table S1.** Prevalence of comorbidities on hospital admission according to study groups.

|                     | <b>Normal<br/>(Score 0–1)<br/>n. 33 (9.1%)</b> | <b>Mild<br/>(Score 2–4)<br/>n. 106 (29.4%)</b> | <b>Moderate/Severe<br/>(Score ≥ 5)<br/>n. 222 (61.5%)</b> | <b><i>p</i> Value</b> |
|---------------------|------------------------------------------------|------------------------------------------------|-----------------------------------------------------------|-----------------------|
| Hypertension        | 26 (78.8%)                                     | 68 (64.2%)                                     | 137 (61.7%)                                               | 0.162                 |
| Diabetes            | 8 (24.2%)                                      | 32 (30.2%)                                     | 77 (34.7%)                                                | 0.413                 |
| Heart failure       | 9 (27.3%)                                      | 29 (27.4%)                                     | 65 (29.3%)                                                | 0.924                 |
| Ictus               | 3 (9.1%)                                       | 14 (13.2%)                                     | 48 (21.6%)                                                | 0.067                 |
| IHCD                | 8 (24.2%)                                      | 28 (26.5%)                                     | 65 (29.3%)                                                | 0.762                 |
| Atrial fibrillation | 2 (6.1%)                                       | 21 (19.8%)                                     | 54 (24.3%)                                                | 0.052                 |
| COPD                | 11 (33.3%)                                     | 49 (46.2%)                                     | 96 (43.2%)                                                | 0.426                 |
| CKD                 | 20 (60.6%)                                     | 67 (63.2%)                                     | 122 (55.0%)                                               | 0.348                 |
| Cirrhosis           | 1 (3.0%)                                       | 8 (7.5%)                                       | 30 (13.5%)                                                | 0.085                 |

Data are expressed as n (percentage). IHCD, ischemic heart chronic disease; COPD, chronic obstructive. pulmonary disease; CKD, chronic kidney disease.
